# Supplementary material for: Comparative sequence analysis and mutagenesis of Ethylene Forming Enzyme (EFE) 2-oxoglutarate/Fe(II)-dependent dioxygenase homologs
Source: PubMed Central journal article supplement (PMC4202696; doi:10.1186/1471-2091-15-22), 2014-10-02
Supplement: 1471-2091-15-22-S1.pdf [file 1471-2091-15-22-S1.pdf]

|                  |                                                               |     |
|------------------|---------------------------------------------------------------|-----|
| EFE_M_stipitatus | MIELETFQLPQSVSGREADIALGLTMVRAWRRDGIQVRMSPAQAQAEKSQRAFELSRHFFR | 60  |
| EFE_P_syringae   | MTNLQTFELPTEVTGCAADISLGRALIQAQKDGIFQIKTDSEQDRKTQEAMAASKQFCK   | 60  |
|                  | * :*:***:** .*: * **:* ** :::**::*****: . * .*:*. * : **:* :  |     |
| EFE_M_stipitatus | QSLETKARCVSDLTYSGYIASGQELTASEADLSEVFTVCRDVPLTDPRVQSKWPCGPGP   | 120 |
| EFE_P_syringae   | EPLTFKSSCVSDLTYSGYVASGEEVTAGKPDFPEIFTVCKDLSVGDQRVKAGWPCHGVP   | 120 |
|                  | : * * : *****:* **:* ** . : * : *****:* : * ** : : ***** *    |     |
| EFE_M_stipitatus | WPDESWRQGMQAHAEELGSVGERLLRLIALGLGLDIDALTTLTHDGWHHMRVLRFPARSP  | 180 |
| EFE_P_syringae   | WPNNTYQKSMKTFMEELGLAGERLLKLTALGFELPINTFTDLTRDGWHHMRVLRFPQP    | 180 |
|                  | **:::***.***. **** .*****:* **:* * *::* **:****** ** : :      |     |
| EFE_M_stipitatus | TTTRGIGAHTDYGLLVIAAQDDVGGLYVRPPVEGEKRPRNWLPHESSAGMYEHDEPWTVV  | 240 |
| EFE_P_syringae   | TLSRGIGAHTDYGLLVIAAQDDVGGLYIRPPVEGEKRNRNWLPGESSAGMFEHDEPWTFV  | 240 |
|                  | * :*****:*****:***** ***** *****:*****:*                      |     |
| EFE_M_stipitatus | KPVPGLTVFPGDILQFLTRGYLLSTPHKVVLNTRERFALAYFHEPQFEACVRPLSAPTR   | 300 |
| EFE_P_syringae   | TPTPGVWTVFPGDILQFMTGGQLLSTPHKVKLNTRERFACAYFHEPNFEASAYPLFEP    | 300 |
|                  | .*.*** *****:* * ***** ***** *****:***. ** * :                |     |
| EFE_M_stipitatus | DEYIHYGTHFTNMFMRSPDRVTTQRILDESRLTTLNWLRLQEAFLRTAPLEAVPLQRAAG  | 360 |
| EFE_P_syringae   | NERIHYGEHFTNMFMRSPDRITTTQRINKENRLAHLLEDLKKYSRTRATGS-----      | 350 |
|                  | :* **** *****.*****:***** .*.** : * . *:: : *::               |     |
